# Supplementary material for: Developing a questionnaire to evaluate an automated audit & feedback intervention: a Rand-modified Delphi method
Source: Springer Nature journal article supplement (doi:10.1186/s12913-024-10915-2), 2024-04-05
Supplement: MOESM1 [file 26949416]

## Additional file 1

This additional file concerns the characteristics of the participating panelists.

| Participant | Organization | Type of organization/ description                  | Type of healthcare provider       | Concannon 2012 framework |
|-------------|--------------|----------------------------------------------------|-----------------------------------|--------------------------|
| 1           | Vivel        | Umbrella organization                              | Psychologist                      | Policy maker             |
| 2           | BeHive       | Academic                                           | Nurse                             | Principal investigators  |
| 3           | Paqs         | Care quality                                       | Researcher                        | Policy maker             |
| 4           | Cebam        | Evidence Based Practice                            | Researcher<br>Biomedical sciences | Policy maker             |
| 5           | Cebam        | Evidence Based Practice                            | General practitioner              | Policy maker             |
| 6           | Bapcoc       | Federal Government                                 | Pharmacist                        | Policy maker             |
| 7           | KCE          | Research                                           | Pediatrician                      | Principal investigators  |
| 8           | Domus Medica | Professional organization of health care providers | General practitioner              | Providers                |
| 9           | APB          | Professional organization of health care providers | Pharmacist                        | Providers                |
| 10          | APB          | Professional organization of health care providers | Pharmacist                        | Providers                |
| 11          | ACHG         | User EHR                                           | General practitioner              | Providers                |
| 12          | ACHG         | Coordinator integrated care projects               | General practitioner              | Policy maker             |
| 13          | ACHG         | Research                                           | General practitioner              | Principal investigators  |
| 14          | ACHG         | Research                                           | General practitioner              | Principal investigators  |

Vlaams Instituut Voor de Eerste Lijn (Vivel) – Plateforme pour l'Amélioration continue de la Qualité des soins et de la Sécurité des patients (Paqs) - Centrum Voor Evidence-Based Medicine (Cebam) – Belgische Commissie voor de Coördinatie van het antibioticabeleid (BAPCOC) – Federaal Kenniscentrum voor de Gezondheidszorg (KCE) – Algemene Pharmaceutische Bond (APB) – Academisch Centrum voor Huisartsgeneeskunde (ACHG)
